# Supplementary material for: Identification of epileptic brain states by dynamic functional connectivity analysis of simultaneous EEG-fMRI: a dictionary learning approach
Source: PubMed Central journal article supplement (PMC6345787; doi:10.1038/s41598-018-36976-y), 2019-01-24
Supplement: 41598_2018_36976_MOESM1_ESM.pdf [file 41598_2018_36976_MOESM1_ESM.pdf]

## **Title**

Identification of epileptic brain states by dynamic functional connectivity analysis of simultaneous EEG-fMRI: a dictionary learning approach

## **Authors**

Rodolfo Abreu<sup>1,\*</sup>, Alberto Leal<sup>2</sup>, Patrícia Figueiredo<sup>1</sup>

## **Affiliations**

<sup>1</sup>ISR-Lisboa/LARSyS and Department of Bioengineering, Instituto Superior Técnico – Universidade de Lisboa, Portugal

<sup>2</sup>Department of Neurophysiology, Centro Hospitalar Psiquiátrico de Lisboa, Lisbon, Portugal

\* *Corresponding author*

Email address: [rodolfo.abreu@tecnico.ulisboa.pt](mailto:rodolfo.abreu@tecnico.ulisboa.pt)

Phone number: +351 919 623 032

| Method                                   | Window length   |              |                 |              |                 |              |                 |              |
|------------------------------------------|-----------------|--------------|-----------------|--------------|-----------------|--------------|-----------------|--------------|
|                                          | 12 TRs (30.0 s) |              | 18 TRs (45.0 s) |              | 21 TRs (52.5 s) |              | 24 TRs (60.0 s) |              |
|                                          | <i>P1-P5</i>    | <i>P6-P8</i> | <i>P1-P5</i>    | <i>P6-P8</i> | <i>P1-P5</i>    | <i>P6-P8</i> | <i>P1-P5</i>    | <i>P6-P8</i> |
| <i>k</i> -CL                             | 0.75            | 0.67         | 0.77            | 0.75         | 0.70            | 0.66         | 0.74            | 0.47         |
| PCA                                      | 0.64            | 0.66         | 0.45            | 0.35         | 0.24            | 0.33         | 0.33            | 0.58         |
| <i>l</i> <sub>0</sub> -DL                | 0.58            | 0.30         | 0.67            | 0.12         | 0.55            | 0.27         | 0.57            | 0.40         |
| <i>l</i> <sub>0</sub> -DL <sub>CL</sub>  | 0.68            | 0.50         | 0.71            | 0.58         | 0.82            | 0.55         | 0.77            | <b>0.62</b>  |
| <i>l</i> <sub>0</sub> -DL <sub>PCA</sub> | 0.37            | 0.37         | 0.38            | 0.61         | 0.28            | 0.62         | 0.33            | 0.64         |
| <i>l</i> <sub>1</sub> -DL                | 0.89            | 0.54         | 0.75            | <b>0.90</b>  | 0.84            | <b>0.81</b>  | 0.84            | 0.59         |
| <i>l</i> <sub>1</sub> -DL <sub>CL</sub>  | <b>0.95</b>     | 0.67         | 0.84            | 0.64         | 0.75            | 0.49         | 0.79            | 0.55         |
| <i>l</i> <sub>1</sub> -DL <sub>PCA</sub> | 0.81            | <b>0.88</b>  | <b>0.90</b>     | 0.75         | <b>0.91</b>     | 0.56         | <b>0.84</b>     | 0.56         |

**Table S1: Average spatial correlation across patients from the two subgroups, between  $dFC_{\max}$  obtained with the original window length of 37.5 s (15 TRs) and those obtained with the four window lengths: 12 TRs (30.0 s), 18 TRs (45.0 s), 21 TRs (52.5 s) and 24 TRs (60.0 s). *l*<sub>1</sub>-DL<sub>PCA</sub> outperformed all the other methods in most cases, being only surpassed by other *l*<sub>1</sub>-DL variants.**

| Performance measures     |                                |                           |                            |                       |                           |                            |                                |                           |                            |                       |                           |                            |                                |                           |                            |                       |                           |                            |                                |                           |                            |                       |                           |                            |
|--------------------------|--------------------------------|---------------------------|----------------------------|-----------------------|---------------------------|----------------------------|--------------------------------|---------------------------|----------------------------|-----------------------|---------------------------|----------------------------|--------------------------------|---------------------------|----------------------------|-----------------------|---------------------------|----------------------------|--------------------------------|---------------------------|----------------------------|-----------------------|---------------------------|----------------------------|
| Methods                  | Window length: 12 TRs = 30.0 s |                           |                            |                       |                           |                            | Window length: 18 TRs = 45.0 s |                           |                            |                       |                           |                            | Window length: 21 TRs = 52.5 s |                           |                            |                       |                           |                            | Window length: 24 TRs = 60.0 s |                           |                            |                       |                           |                            |
|                          | Patients P1-P5                 |                           |                            | Patients P6-P8        |                           |                            | Patients P1-P5                 |                           |                            | Patients P6-P8        |                           |                            | Patients P1-P5                 |                           |                            | Patients P6-P8        |                           |                            | Patients P1-P5                 |                           |                            | Patients P6-P8        |                           |                            |
|                          | $\bar{\rho}_{\max}^*$          | $\bar{\rho}_{\text{dFC}}$ | $\bar{\rho}_{\text{CTRL}}$ | $\bar{\rho}_{\max}^*$ | $\bar{\rho}_{\text{dFC}}$ | $\bar{\rho}_{\text{CTRL}}$ | $\bar{\rho}_{\max}^*$          | $\bar{\rho}_{\text{dFC}}$ | $\bar{\rho}_{\text{CTRL}}$ | $\bar{\rho}_{\max}^*$ | $\bar{\rho}_{\text{dFC}}$ | $\bar{\rho}_{\text{CTRL}}$ | $\bar{\rho}_{\max}^*$          | $\bar{\rho}_{\text{dFC}}$ | $\bar{\rho}_{\text{CTRL}}$ | $\bar{\rho}_{\max}^*$ | $\bar{\rho}_{\text{dFC}}$ | $\bar{\rho}_{\text{CTRL}}$ | $\bar{\rho}_{\max}^*$          | $\bar{\rho}_{\text{dFC}}$ | $\bar{\rho}_{\text{CTRL}}$ | $\bar{\rho}_{\max}^*$ | $\bar{\rho}_{\text{dFC}}$ | $\bar{\rho}_{\text{CTRL}}$ |
| $k$ -CL                  | 0.46                           | 0.51                      | -0.18                      | 0.31                  | 0.57                      | -0.09                      | 0.52                           | 0.58                      | -0.30                      | 0.43                  | 0.54                      | -0.09                      | 0.53                           | 0.60                      | -0.34                      | 0.45                  | 0.47                      | -0.09                      | 0.55                           | 0.67                      | -0.39                      | 0.43                  | 0.52                      | -0.48                      |
| PCA                      | 0.25                           | 0.44                      | -0.13                      | 0.19                  | 0.31                      | -0.15                      | 0.31                           | 0.41                      | -0.17                      | 0.17                  | 0.32                      | -0.16                      | 0.37                           | 0.48                      | -0.27                      | 0.25                  | 0.37                      | -0.20                      | 0.33                           | 0.46                      | -0.21                      | 0.30                  | 0.42                      | -0.17                      |
| $l_0$ -DL                | 0.47                           | 0.47                      | -0.22                      | 0.33                  | 0.22                      | -0.26                      | 0.56                           | 0.64                      | -0.40                      | 0.48                  | 0.50                      | -0.26                      | <b>0.58</b>                    | 0.62                      | -0.52                      | 0.47                  | 0.54                      | -0.26                      | 0.56                           | 0.57                      | -0.50                      | 0.47                  | 0.57                      | -0.39                      |
| $l_0$ -DL <sub>CL</sub>  | <b>0.48</b>                    | 0.48                      | -0.30                      | 0.35                  | 0.36                      | -0.32                      | 0.54                           | 0.49                      | -0.41                      | 0.48                  | 0.55                      | -0.32                      | 0.57                           | 0.60                      | -0.48                      | <b>0.52</b>           | 0.51                      | -0.32                      | 0.59                           | 0.68                      | -0.54                      | 0.50                  | 0.56                      | -0.49                      |
| $l_0$ -DL <sub>PCA</sub> | 0.38                           | 0.35                      | -0.26                      | 0.33                  | 0.20                      | -0.26                      | 0.41                           | 0.44                      | -0.26                      | <b>0.50</b>           | 0.53                      | -0.26                      | 0.41                           | 0.34                      | -0.42                      | 0.46                  | 0.43                      | -0.26                      | 0.42                           | 0.37                      | -0.21                      | 0.47                  | 0.57                      | -0.40                      |
| $l_1$ -DL                | 0.46                           | 0.56                      | -0.26                      | 0.36                  | 0.35                      | -0.24                      | 0.53                           | 0.63                      | -0.42                      | 0.45                  | <b>0.63</b>               | -0.24                      | 0.56                           | 0.69                      | -0.40                      | 0.47                  | <b>0.58</b>               | -0.24                      | 0.59                           | 0.67                      | -0.54                      | 0.50                  | <b>0.64</b>               | -0.56                      |
| $l_1$ -DL <sub>CL</sub>  | 0.45                           | 0.58                      | -0.20                      | 0.35                  | 0.58                      | -0.20                      | 0.53                           | 0.64                      | -0.34                      | 0.44                  | 0.57                      | -0.20                      | 0.56                           | 0.69                      | -0.46                      | 0.47                  | 0.51                      | -0.20                      | 0.57                           | 0.67                      | -0.47                      | 0.48                  | 0.53                      | -0.43                      |
| $l_1$ -DL <sub>PCA</sub> | 0.47                           | <b>0.63</b>               | -0.19                      | <b>0.37</b>           | <b>0.60</b>               | -0.21                      | <b>0.57</b>                    | <b>0.65</b>               | -0.39                      | 0.47                  | 0.59                      | -0.21                      | 0.56                           | <b>0.70</b>               | -0.41                      | 0.50                  | 0.54                      | -0.21                      | <b>0.60</b>                    | <b>0.69</b>               | -0.49                      | <b>0.51</b>           | 0.58                      | -0.46                      |

**Table S2: Average performance of each dFC state identification method using four different window lengths:** 12 TRs (30.0 s), 18 TRs (45.0 s), 21 TRs (52.5 s) and 24 TRs (60.0 s).  $l_1$ -DL<sub>PCA</sub> outperformed all the other methods in most cases, being only surpassed by other DL variants, and never by  $k$ -CL or PCA.

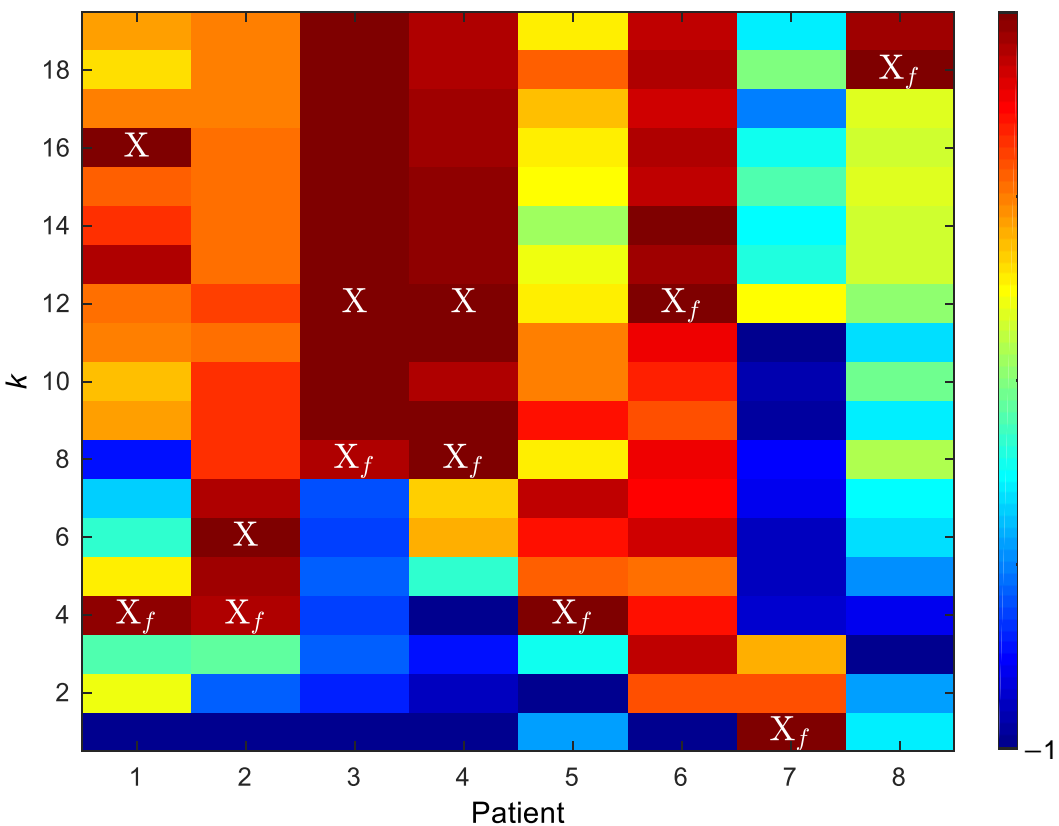

**Figure S1: Correlation coefficients ( $\rho$ ) obtained with  $l_1$ -DL<sub>PCA</sub> for each  $k$  and each patient. “X” highlights the  $k$  for which  $\rho_{\max}$  was obtained, and “X<sub>f</sub>” denotes the smallest  $k$  necessary to achieve 90% of  $\rho_{\max}$ . These values were normalized between  $-1$  and  $1$  patient-wise, for visualization purposes.**
